# Supplementary material
Source: PubMed Central journal article supplement (PMC5600847)
Supplement: NIHMS891115-supplement-1.pdf [file NIHMS891115-supplement-1.pdf]

**Supplementary Table S1.** **A.** List of antibodies used in the study; **B.** Clinical characteristics of the patients from whom CAF-MSC and BM-MSC were isolated.

**Supplementary Table A. List of antibodies used in this study.**

| Application                      | Antigen recognize        | Type      | Reactivity | Host            | Fluorochrome    | Clone      | Catalog Number | Dilution       | Vendor           |
|----------------------------------|--------------------------|-----------|------------|-----------------|-----------------|------------|----------------|----------------|------------------|
| Flow cytometry                   | <b>αFAP</b>              | Primary   | Human      | Mouse           | none            | F11-24     | BMS168         | 1:100          | eBioscience      |
|                                  | <b>IgG (H+L)</b>         | Secondary | Mouse      | Goat            | Alexa Fluor 647 | Polyclonal | A21236         | 1:1000         | Invitrogen       |
|                                  | <b>CD14</b>              | Primary   | Human      | Mouse           | PerCP-Cy5.5     | M5E2       | 550787         | 1:100          | BD Biosciences   |
|                                  | <b>CD19</b>              | Primary   | Human      | Mouse           | PE-Cy7          | HIB19      | 302216         | 1:100          | BioLegend        |
|                                  | <b>CD31</b>              | Primary   | Human      | Mouse           | PE              | WM59       | 555446         | 1:100          | BD Biosciences   |
|                                  | <b>CD34</b>              | Primary   | Human      | Mouse           | PerCP-Cy5.5     | 581        | 343612         | 1:100          | BioLegend        |
|                                  | <b>CD45</b>              | Primary   | Human      | Mouse           | APC CY7         | 2D1        | 557833         | 1:100          | BioLegend        |
|                                  | <b>CD73</b>              | Primary   | Human      | Mouse           | FITC            | AD2        | 561254         | 1:100          | BD Biosciences   |
|                                  | <b>CD90</b>              | Primary   | Human      | Mouse           | BV421           | 5E10       | 328122         | 1:100          | BioLegend        |
|                                  | <b>CD105</b>             | Primary   | Human      | Mouse           | PE              | SN6        | 12-1057-41     | 1:100          | eBioscience      |
|                                  | <b>HLADR</b>             | Primary   | Human      | Mouse           | Pacific Blue    | LN3        | 327016         | 1:100          | BioLegend        |
|                                  | <b>VEGFR2</b>            | Primary   | Human      | Mouse           | APC             | 7D4-6      | 359916         | 1:100          | BioLegend        |
|                                  | <b>GD2</b>               | Primary   | Human      | Mouse           | BUV395          | 14G2a      | 564224         | 1:50           | BD Horizon       |
|                                  | <b>STAT3</b><br>p-Tyr705 | Primary   | Human      | Mouse           | PE              | AD2        | 612569         | 1:100          | BD Biosciences   |
| <b>ERK1/2</b><br>p-Thr202/Tyr204 | Primary                  | Human     | Rabbit     | Alexa Fluor 647 | 197G2           | 13148      | 1:50           | Cell Signaling |                  |
| Immuno-fluorescence              | <b>αFAP</b>              | Primary   | Human      | Mouse           | none            | F11-24     | BMS168         | 1:200          | eBioscience      |
|                                  | <b>FSP-1</b>             | Primary   | Human      | Mouse           | none            | 1CA        | NBP2-36431     | 1:200          | NovusBio         |
|                                  | <b>Vimentin</b>          | Primary   | Human      | Rabbit          | none            | EPR3776    | 92547          | 1:200          | Abcam            |
|                                  | <b>αSMA</b>              | Primary   | Human      | Mouse           | none            | 1A4        | 7817           | 1:200          | Abcam            |
|                                  | <b>Phalloidin</b>        | Primary   | Human      | none            | Alexa Fluor 568 | none       | 12380          | 1:5000         | LifeTechnologies |
|                                  | <b>IgG (H+L)</b>         | Secondary | Mouse      | Donkey          | Alexa Fluor 488 | Polyclonal | A21202         | 1:1000         | Invitrogen       |
|                                  | <b>IgG (H+L)</b>         | Secondary | Rabbit     | Goat            | Alexa Fluor 488 | Polyclonal | A11070         | 1:1000         | Invitrogen       |

|                              |                                    |           |        |        |                 |            |            |        |                                 |
|------------------------------|------------------------------------|-----------|--------|--------|-----------------|------------|------------|--------|---------------------------------|
| <b>Immuno-histochemistry</b> | <b>αFAP</b>                        | Primary   | Human  | Rabbit | none            | Polyclonal | 110779     | 1:300  | Abcam                           |
|                              | <b>FSP-1</b>                       | Primary   | Human  | Mouse  | none            | 1C4        | NBP2-36431 | 1:500  | Novus Bio.                      |
|                              | <b>FSP-1</b>                       | Primary   | Mouse  | Rabbit | none            | EPR14639   | 197896     | 1:250  | Abcam<br>Vector<br>Laboratories |
|                              | <b>Ki-67</b>                       | Primary   | Human  | Rabbit | none            | SP6        | VP-RM04    | 1:200  | Abcam<br>Vector<br>Laboratories |
|                              | <b>IgG (H+L)</b>                   | Secondary | Goat   | Rabbit | Polymer-HRP     | Polyclonal | DS9800     | 1:1    | Leica                           |
|                              | <b>IgG (H+L)</b>                   | Secondary | Rabbit | Mouse  | Polymer-HRP     | Polyclonal | DS9800     | 1:1    | Leica                           |
|                              | <b>IgG (H+L)</b>                   | Secondary | Mouse  | Donkey | Alexa Fluor 488 | Polyclonal | A21202     | 1:1000 | Invitrogen                      |
|                              | <b>IgG (H+L)</b>                   | Secondary | Rabbit | Goat   | Alexa Fluor 594 | Polyclonal | A11012     | 1:1000 | Invitrogen                      |
| <b>Western blot</b>          | <b>p-STAT3</b><br>pTyr705          | Primary   | Human  | Rabbit | none            | Polyclonal | 9131       | 1:100  | Cell Signaling                  |
|                              | <b>p-ERK1/2</b><br>p-Thr202/Tyr204 | Primary   | Human  | Rabbit | none            | Polyclonal | 9101       | 1:100  | Cell Signaling                  |
|                              | <b>STAT-3</b>                      | Primary   | Human  | Mouse  | none            | 79D7       | 4904       | 1:100  | Cell Signaling                  |
|                              | <b>ERK1/2</b>                      | Primary   | Human  | Mouse  | none            | Polyclonal | 9102       | 1:100  | Cell Signaling                  |
|                              | <b>Caspase-3</b>                   | Primary   | Human  | Robbit | none            | 8G10       | 9665       | 1:100  | Cell Signaling                  |
|                              | <b>β-Actin</b>                     | Primary   | Human  | Rabbit | none            | Polyclonal | A2066      | 1:500  | Sigma-Aldrich                   |
|                              | <b>Tubulin</b>                     | Primary   | Human  | Mouse  | none            | TUB2.1     | T4026      | 1:500  | Sigma-Aldrich                   |

**Supplementary Table B. Clinical characteristics of patients from which CAF-MSC and BM-MSC were isolated.**

| <b>Sample ID</b> | <b>Source of MSC</b> | <b>Clinical stage</b> | <b>Histology</b>      | <b>Pathology</b>      | <b><i>MYCN</i>-status*</b> | <b>Treatment</b> | <b>Successful in vitro propagation</b> |
|------------------|----------------------|-----------------------|-----------------------|-----------------------|----------------------------|------------------|----------------------------------------|
| <b>4207-5</b>    | Tumor                | 4                     | Unfavorable           | Poorly differentiated | NA                         | Post-chemo       | Yes                                    |
| <b>4240-5</b>    | Tumor                | 4                     | Unfavorable           | Poorly differentiated | A                          | Post-chemo       | No                                     |
| <b>4263-5</b>    | Tumor                | 4                     | Unfavorable           | Undifferentiated      | A                          | Post-chemo       | Yes                                    |
| <b>4307-5</b>    | Tumor                | 2b                    | Unfavorable           | Poorly differentiated | A                          | Post-chemo       | No                                     |
| <b>4299-5</b>    | Tumor                | 4                     | Unfavorable           | Poorly differentiated | A                          | Post-chemo       | No                                     |
| <b>4309-5</b>    | Tumor                | 4                     | Unfavorable           | Poorly differentiated | NA                         | Post-chemo       | Yes                                    |
| <b>14-0666</b>   | Bone Marrow          | 3                     | Unfavorable           | Undifferentiated      | A                          | Post-chemo       | Yes                                    |
| <b>14-0686</b>   | Bone Marrow          | 4                     | Unfavorable           | Poorly differentiated | NA                         | Post-chemo       | Yes                                    |
| <b>15-0298</b>   | Bone Marrow          | 4                     | Unfavorable           | Poorly differentiated | A                          | Post-chemo       | No                                     |
| <b>15-0410</b>   | Bone Marrow          | 4                     | Not done at diagnosis | Poorly differentiated | A                          | Post-chemo       | Yes                                    |
| <b>15-0652</b>   | Bone Marrow          | 4                     | Unfavorable           | Poorly differentiated | A                          | Post-chemo       | Yes                                    |

\* NA: Not Amplified; A: Amplified
