# Supplementary material
Source: PubMed Central journal article supplement (PMC5600847)

**Supplementary Figure S1. Characterization of CAF-MSC and BM-MSC isolated from different patients.** **A:** The table indicates the percentage of cells expressing each indicated surface marker as determined by flow cytometry analysis; **B:** Representative images of CAF-MSC and BM-MSC stained with Oil Red O and Alizarin Red, respectively. Scale bar = 50  $\mu$ M.

**A**

| Positive cells (%) |                   |                   |
|--------------------|-------------------|-------------------|
| Markers            | CAF-MSC<br>4263-5 | CAF-MSC<br>4309-5 |
| FAP                | 99.0              | 98.4              |
| CD73               | 95.6              | 80.2              |
| CD90               | 96.7              | 96.6              |
| CD105              | 69.5              | 65.1              |
| CD34               | 0.0               | 2.4               |
| CD45               | 0.4               | 0.1               |
| HLA-DR             | 0.2               | 0.0               |
| CD14               | 0.3               | 0.0               |
| CD19               | 0.0               | 0.3               |

| Positive cells (%) |                   |                   |                   |
|--------------------|-------------------|-------------------|-------------------|
| Markers            | BM-MSC<br>14-0666 | BM-MSC<br>15-0410 | BM-MSC<br>15-0652 |
| CD73               | 85.2              | 90.5              | 90.8              |
| CD90               | 95.5              | 97.2              | 89.3              |
| CD105              | 55.6              | 68.4              | 55.4              |
| CD34               | 0.2               | 4.8               | 0.1               |
| CD45               | 0.0               | 0.0               | 0.0               |
| HLA-DR             | 0.1               | 0.1               | 0.1               |
| CD14               | 0.0               | 0.0               | 0.1               |
| CD19               | 0.4               | 0.4               | 0.1               |

**B**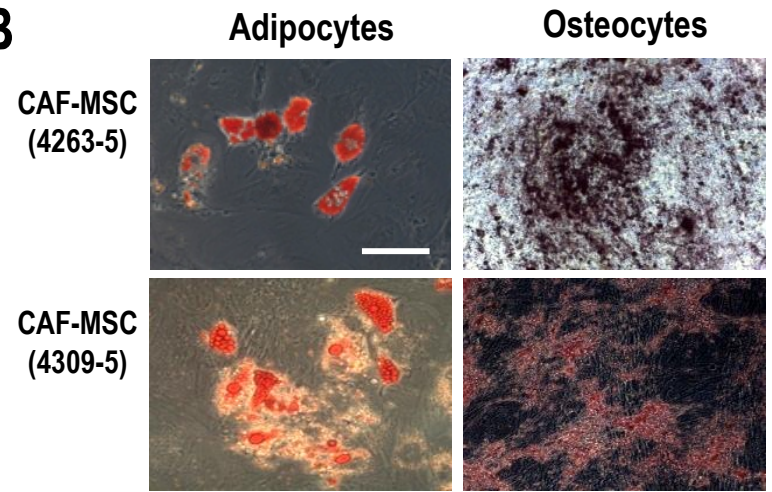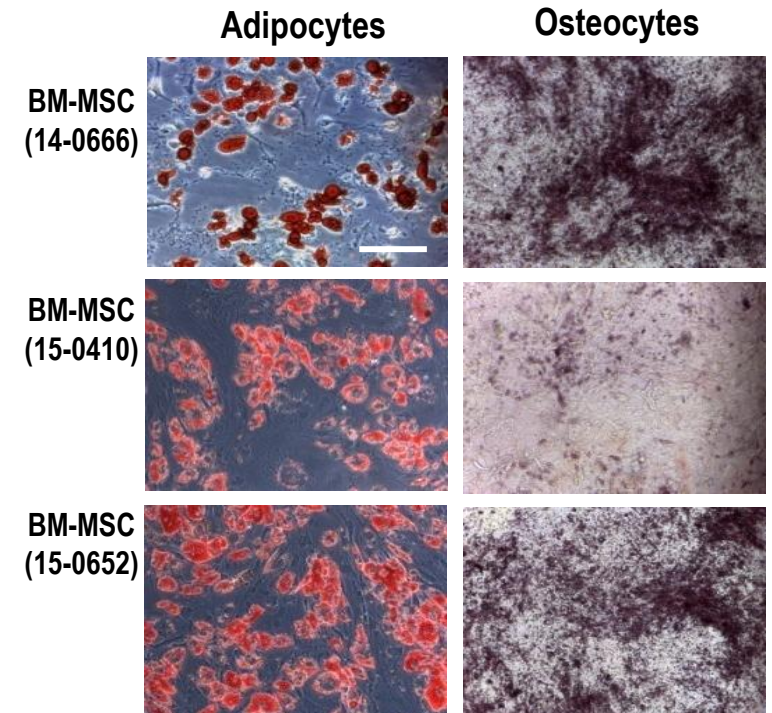

Supplement: NIHMS891115-supplement-2.pdf [file NIHMS891115-supplement-2.pdf]
