# Supplementary material
Source: PubMed Central journal article supplement (PMC5600847)

**Supplementary Figure S2. CAF isolated from patients with NB share characteristics with MSC.**

**A:** Histogram representing the quantification of differentiated cells by measuring the absorbance ( $\pm$ SD) of solubilized Oil Red O staining (adipocytes), Alizarin Red (osteocytes) and Alcian Blue (chondrocytes) from duplicate wells, showed in Fig.1D; **B:** Representative images of dual immunofluorescent staining of sections of NB tumors (n=3) for FSP-1 (green) and CD163 (red) as described in Materials and Methods and counterstained with DAPI. Scale bar = 50  $\mu$ m; **C:** Scatter diagrams of mRNA expression of FSP-1 and CD163 in primary tumors of children with high-risk NB (n=219). Spearman correlation values and regression lines for the entire dataset and subsets of samples with MYCN-A (blue line) and those with MYC-NA (red line). \*p<0.05; \*\*\*\*p< 0.0001; n.s. = not significant.

**A**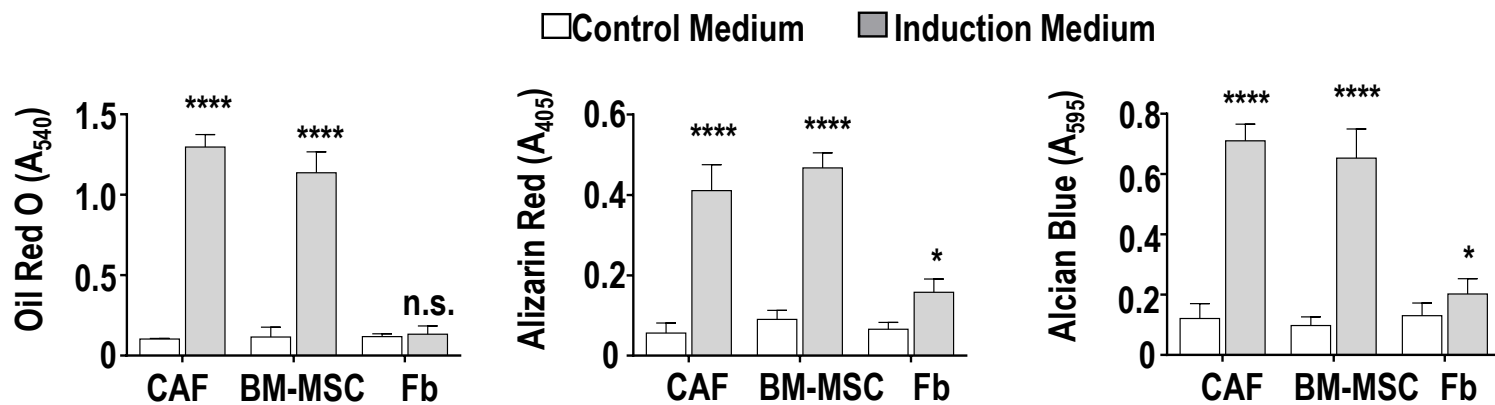**B**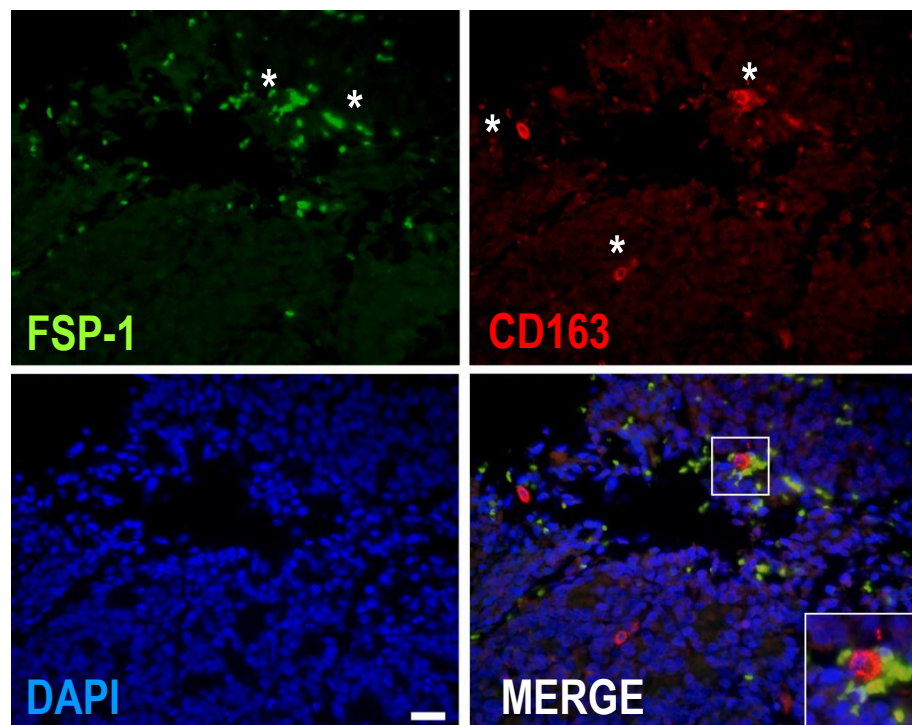**C**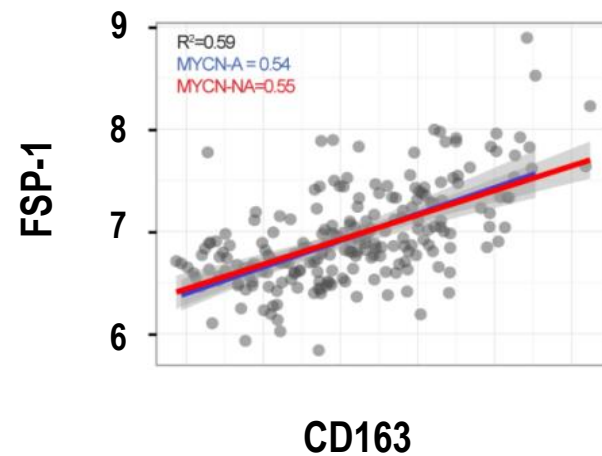

Supplement: NIHMS891115-supplement-3.pdf [file NIHMS891115-supplement-3.pdf]
