# Supplementary material
Source: PubMed Central journal article supplement (PMC5600847)
Supplement: NIHMS891115-supplement-4.pdf [file NIHMS891115-supplement-4.pdf]

**Supplementary Figure S3. CAF-MSC increase tumor engraftment and growth in xenograft model.** **A:** Representative bioluminescence images of NSG mice (n=5 per group) taken at day 26 after subcutaneous injection into the right flank of CHLA-255-FLuc cells, either alone or mixed with CAF-MSC at different ratio (4:0.5 / 4:1 / 4:2); **B:** Percentage of engrafted tumors in each group; **C:** Representative pictures of tumors harvested at day 27; **D:** Average of the bioluminescence signal intensity (p/s = photons per second) over time of all mice ( $\pm$ SEM) in each group; **E:** Average tumor size ( $\pm$ SEM) over time of all mice in each group. \*p<0.05; \*\*p< 0.01, \*\*\* for p<0.001, and \*\*\*\* for p< 0.0001.

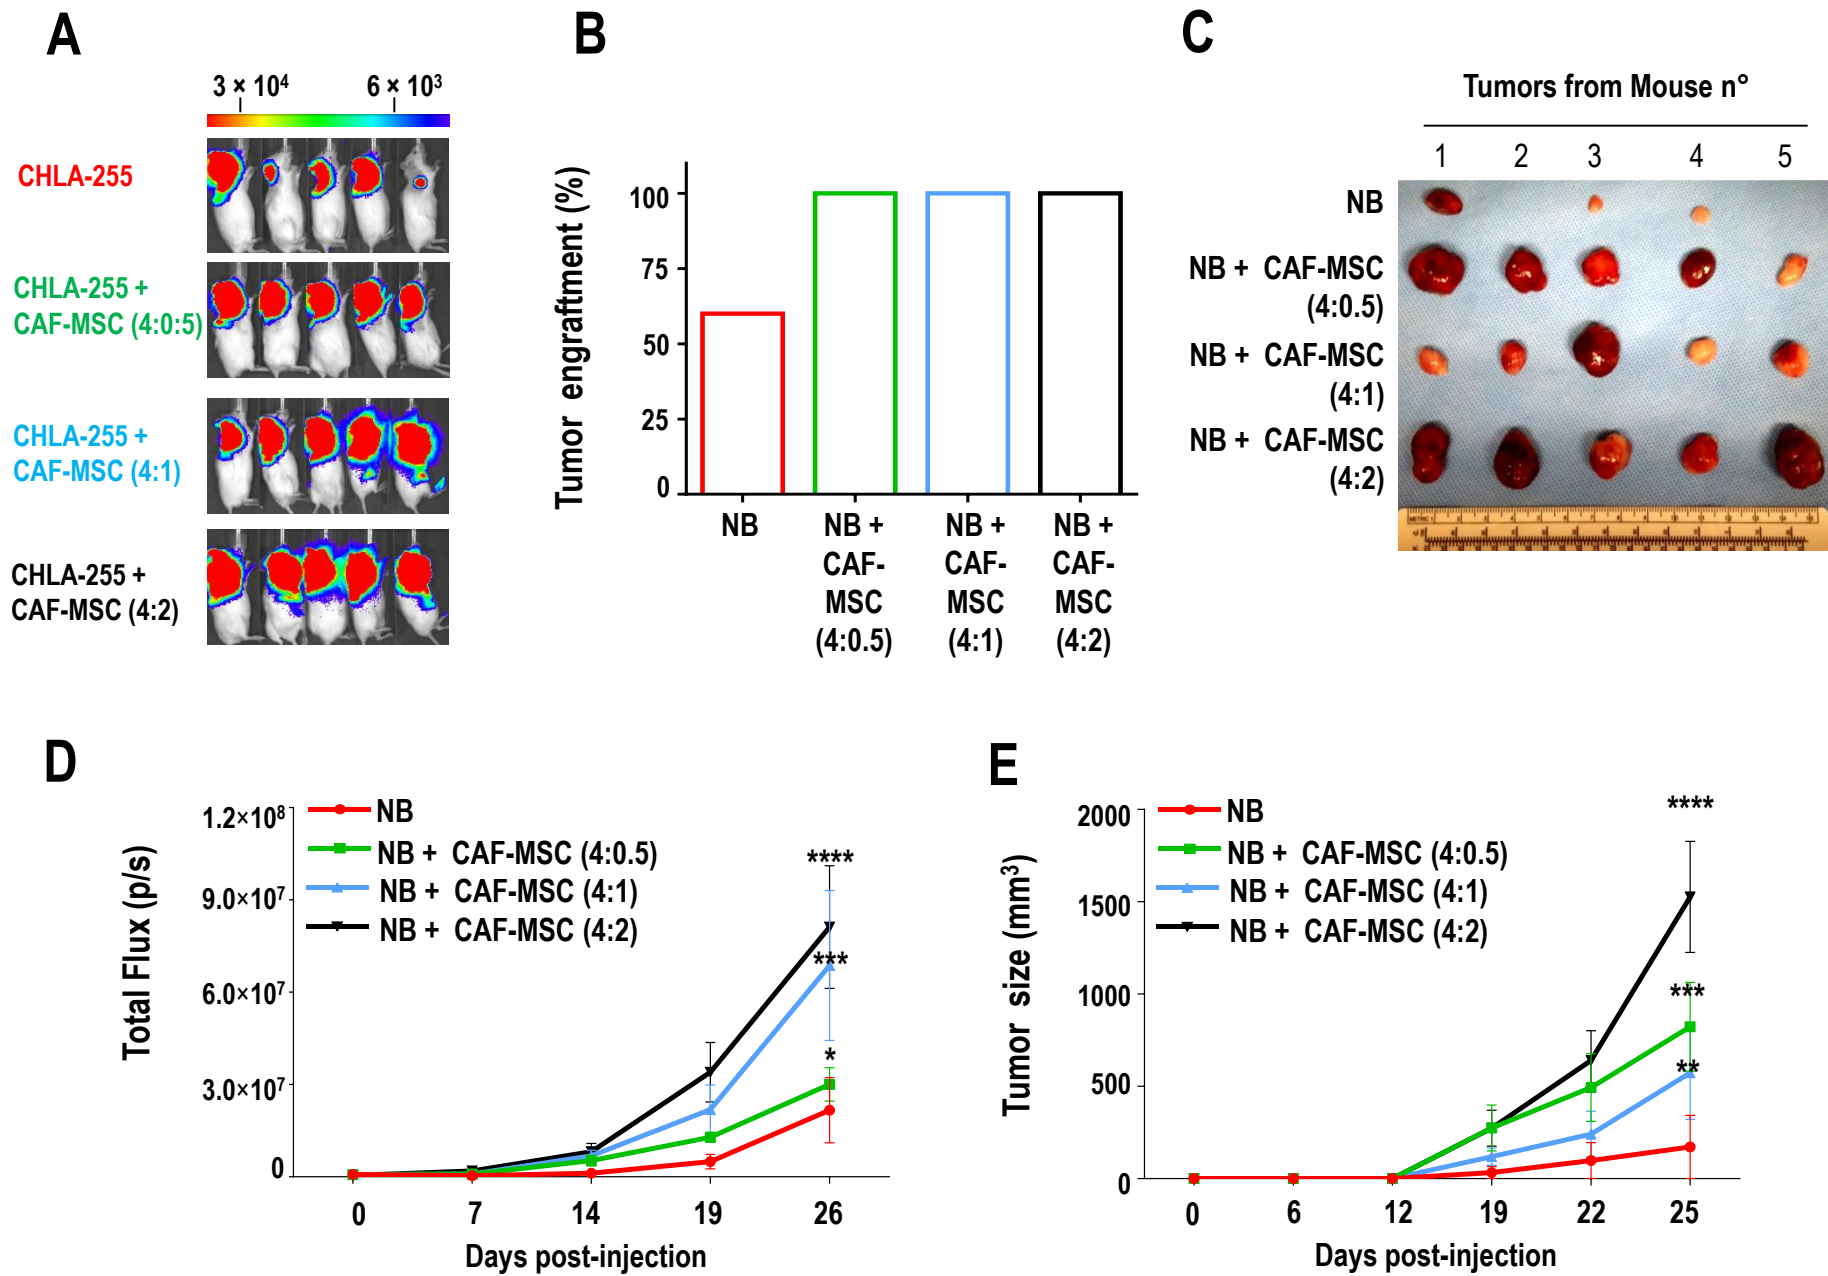

Supplementary Figure S3
