# Supplementary material
Source: PubMed Central journal article supplement (PMC5600847)
Supplement: NIHMS891115-supplement-5.pdf [file NIHMS891115-supplement-5.pdf]

**Supplementary Figure S4. CAF-MSC and BM-MSC enhance cell viability of NB cells *in vitro* and protect tumor cells from drug-induced apoptosis *in vitro*.** **A:** NB-FLuc cells were co-cultured in direct contact (top panel) with CAF-MSC and BM-MSC isolated from the indicated samples (ratio 4:1) and examined for viability after 4 days as in Figure 3. Data represent the mean ( $\pm$ SD) luminescence activity in relative light units (RLU) from three samples; NB cells were cultured in CM (bottom panel) from NB, NB/CAF-MSC or NB/BM-MSC CM co-cultures and examined for viability after 4 days as in Figure 3. Data represent the mean ( $\pm$ SD) luminescence activity in relative light units (RLU) from three samples; **B:** NB cells were cultured in CM from NB, NB/CAF-MSC, NB/BM-MSC or NB/Fb co-cultures, treated with increasing concentrations of etoposide and melphalan and examined for cell viability after 48 hours as in Figure 4. The graphs represent the dose-response curves with the mean ( $\pm$ SD) percentage of viable cells from control (no drug) determined by luminescence activity of triplicate samples. \* $p < 0.05$ ; \*\* $p < 0.01$ ; \*\*\* $p < 0.001$ .

**A**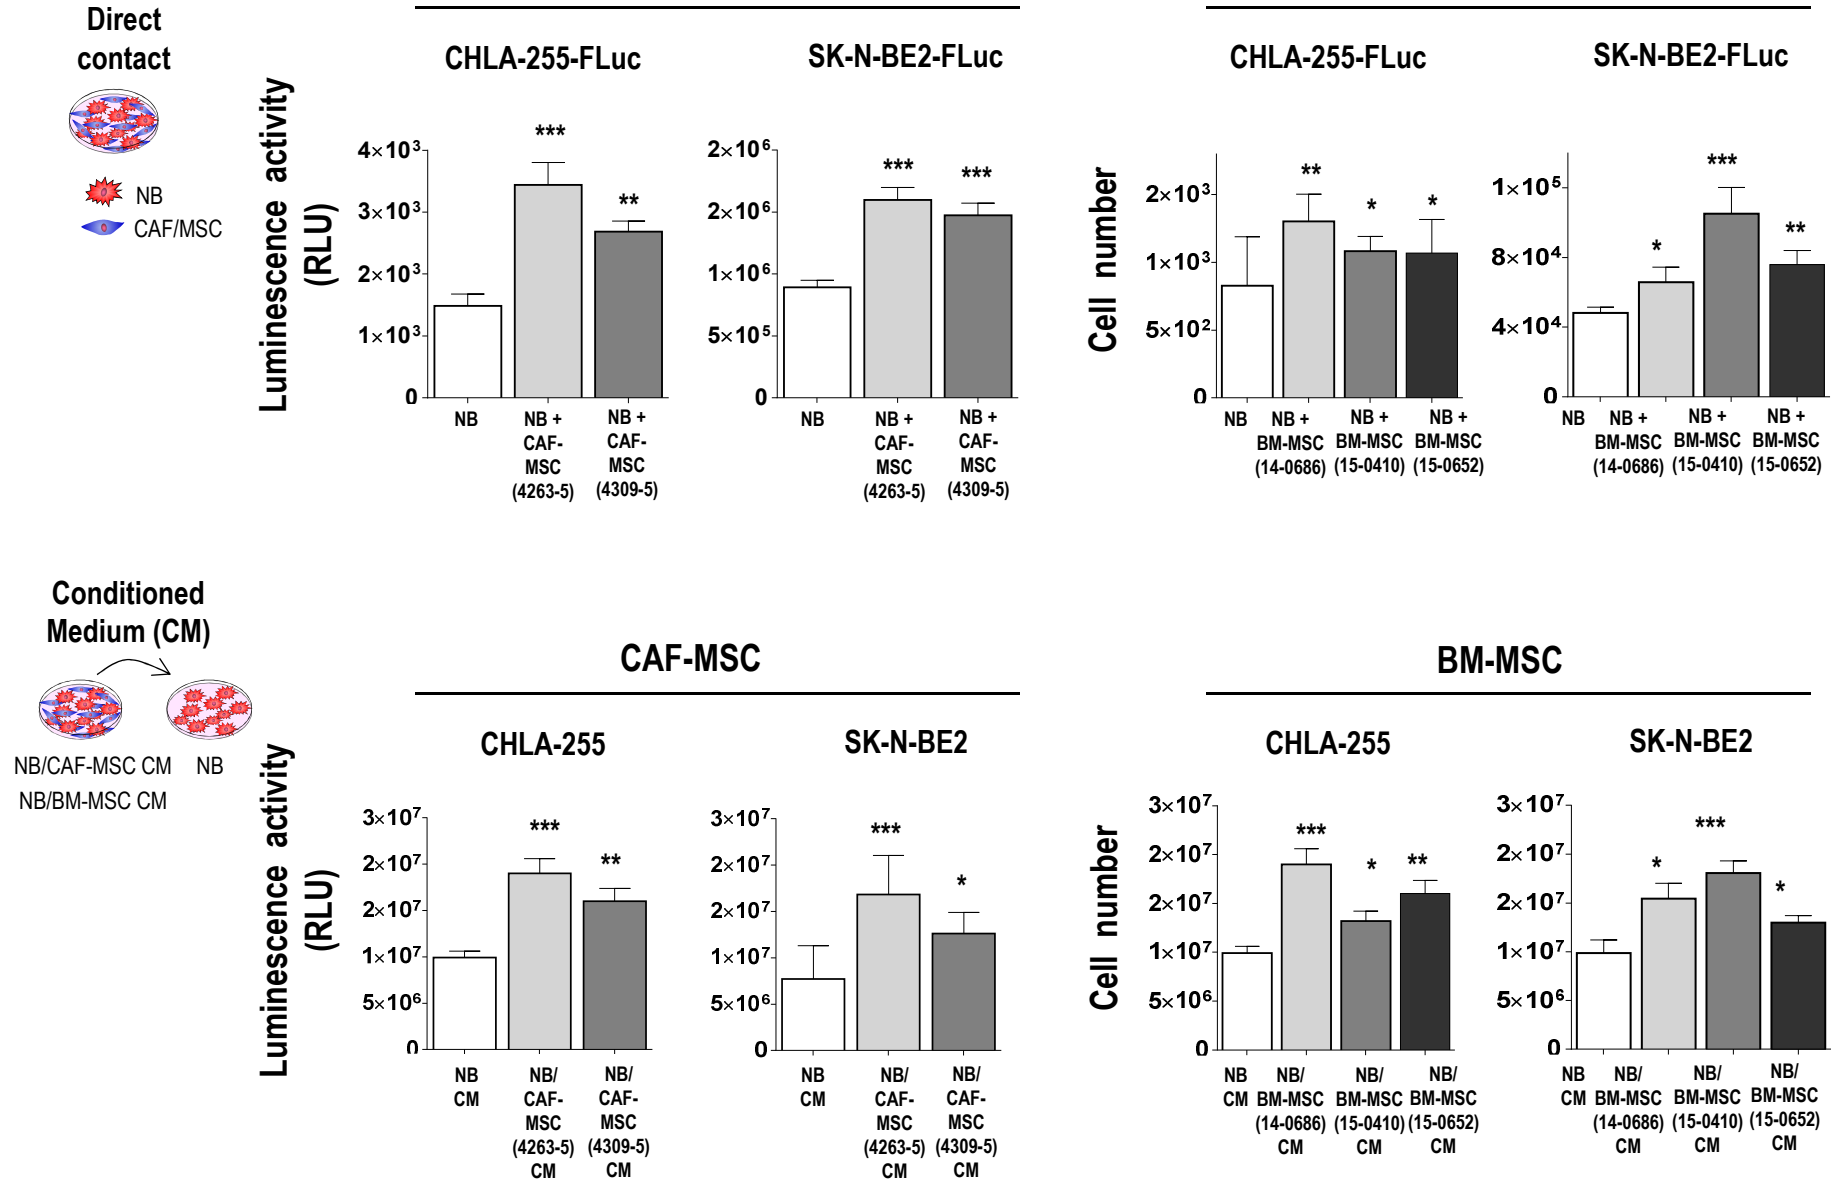

Supplementary Figure S4A

**B**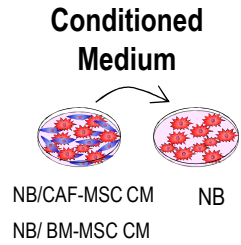

—■— NB CM  
—▼— NB / CAF-MSC (4263-5) CM  
—◆— NB / CAF-MSC (4309-5) CM

—■— NB CM  
—▼— NB / BM-MSC (14-0666) CM  
—◆— NB / BM-MSC (15-0410) CM  
—■— NB / BM-MSC (15-0652) CM

**CAF-MSC****BM-MSC**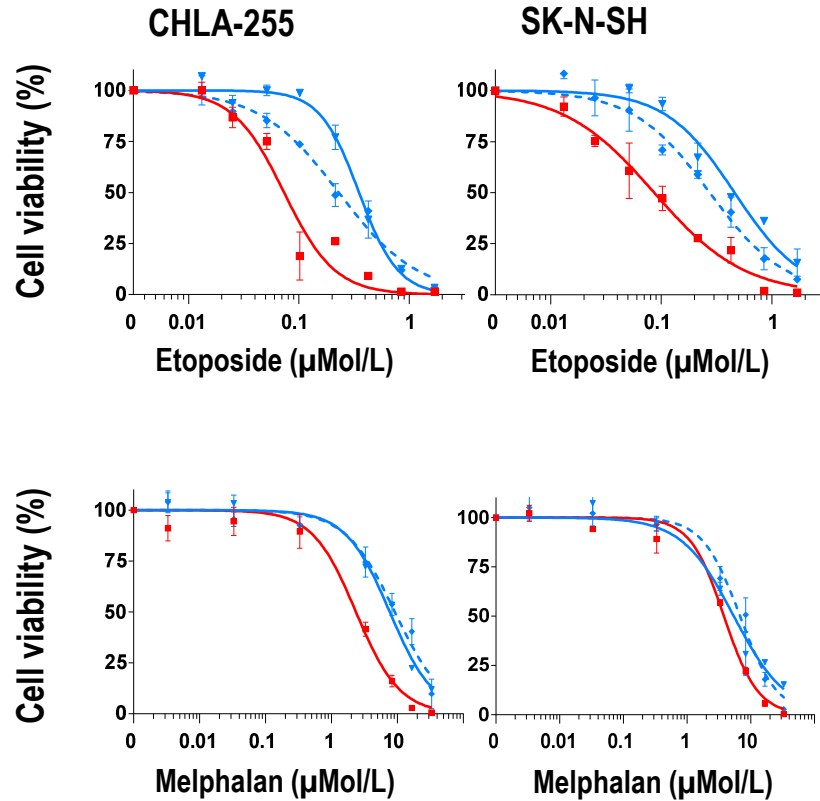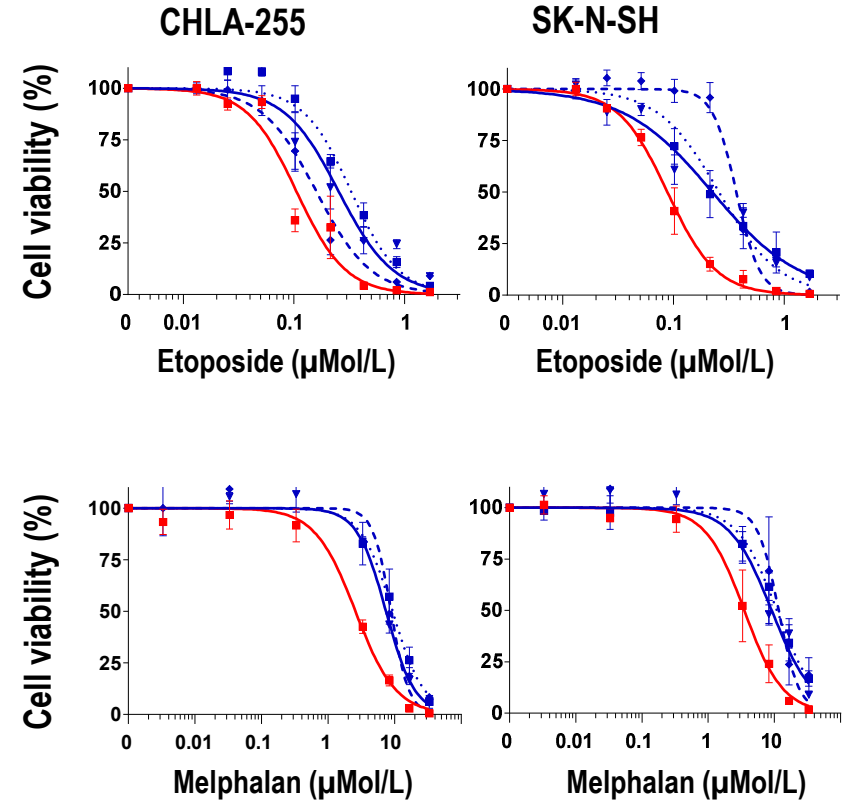

Supplementary Figure S4B
