# Supplementary material
Source: PubMed Central journal article supplement (PMC5600847)
Supplement: NIHMS891115-supplement-6.pdf [file NIHMS891115-supplement-6.pdf]

**Supplementary Figure S5. CAF-MSC and BM-MSC induce activation of STAT3 and ERK1/2 signaling in SK-N-SH cells.** **A:** SK-N-SH cells were exposed to CM from NB, NB/CAF-MSC, NB/BM-MSC or NB/Fb co-cultures and analyzed after 30 minutes for phosphorylated proteins as described in Figure 5A; **B:** Western blot analysis of the expression of p-STAT3, STAT3, p-ERK1/2 and ERK1/2 in SK-N-SH and CHLA-255 cells exposed to NB/CAF-MSC or NB/BM-MSC CM at indicated time points. Tubulin was used as a loading control. Data are representative of one of two independent experiments showing similar results; **C:** CHLA-255 cells were exposed to CM from NB alone or NB/BM-MSC co-culture, treated with ruxolitinib (R), trametinib (T) or their combination (R+T), and examined for viability after 48 hours. The data represent the mean ( $\pm$ SD) fold change in viability determined by luminescence activity from triplicate samples and results are representative of one of two independent experiments. \* $p < 0.05$ ; \*\* $p < 0.01$ ; \*\*\* $p < 0.001$ ; \*\*\*\* $p < 0.0001$ .

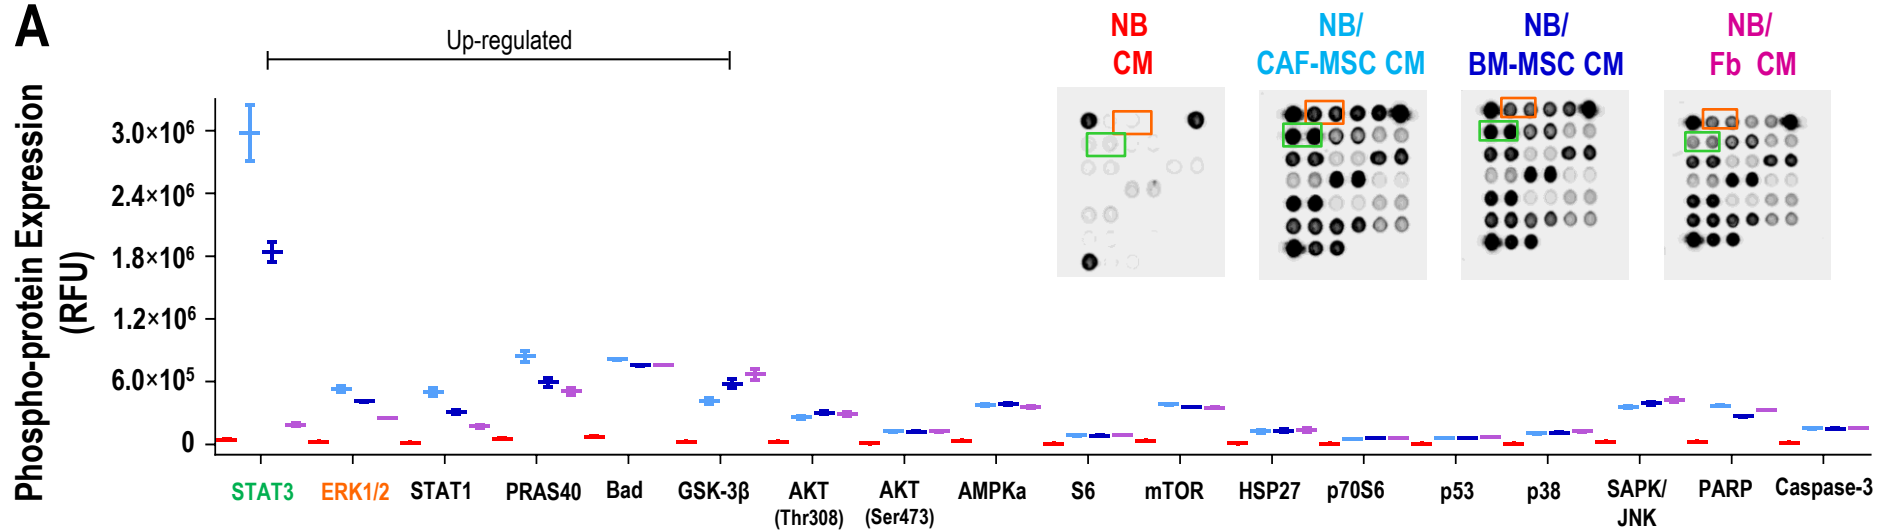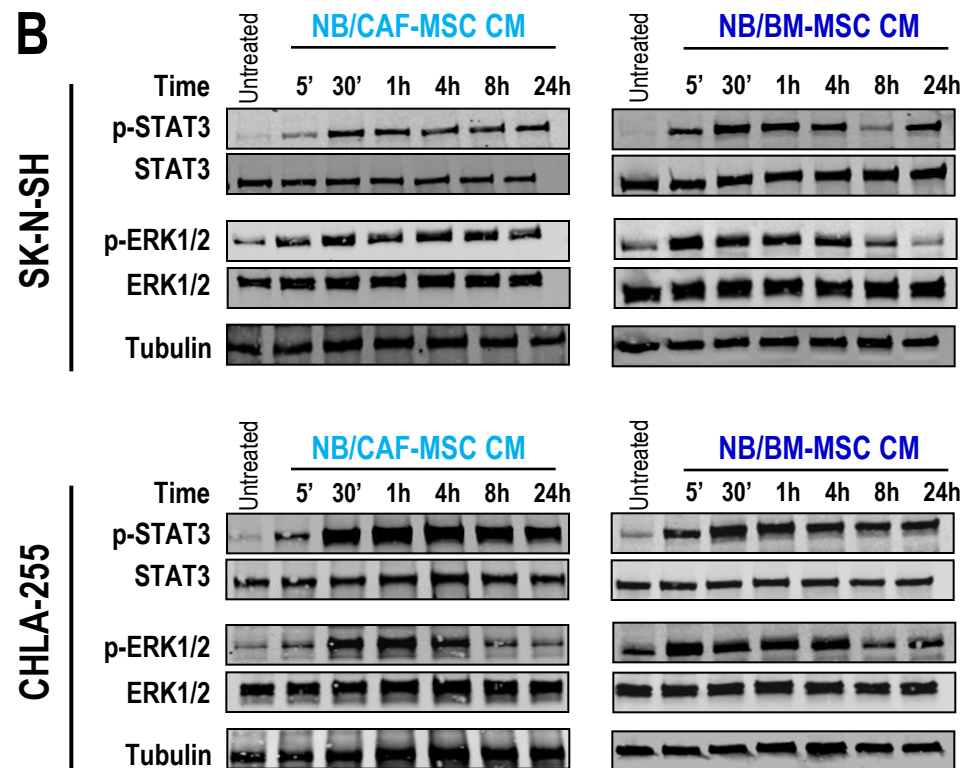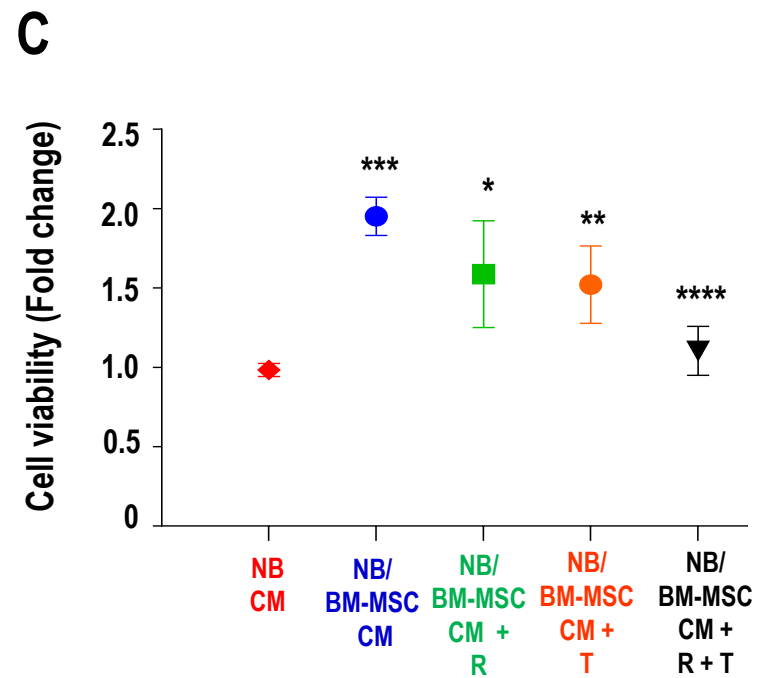

Supplementary Figure S5
