# Supplementary material
Source: PubMed Central journal article supplement (PMC5600847)
Supplement: NIHMS891115-supplement-7.pdf [file NIHMS891115-supplement-7.pdf]

**Supplementary Figure S6. Cytokines and chemokines not up-regulated by NB-MSC interaction and lack of inhibition of STAT3 activation by anti-IL-6/IL-6R .** **A:** CHLA-255 cells CAF-MSC and BM-MSC were cultured alone or together as described in Fig. 5G and the level of the soluble factors present in the CM was analyzed by a Cytokine Array Panel. Left: Mean ( $\pm$ SD) pixel density of indicated cytokines. Right: Pictures of the blot. **B:** Western blot analysis of the expression of p-STAT3 and STAT3 in CHLA-255 cells treated with IL-6 (10 ng/ml) and sIL-6R (25 ng/ml), or NB/CAF-MSC or NB/BM-MSC CM for 30 minutes in presence or absence of neutralizing anti-IL-6 or anti-IL6R antibodies at indicated concentrations. Tubulin was used as a loading control. Data are representative of one of two independent experiments showing similar results

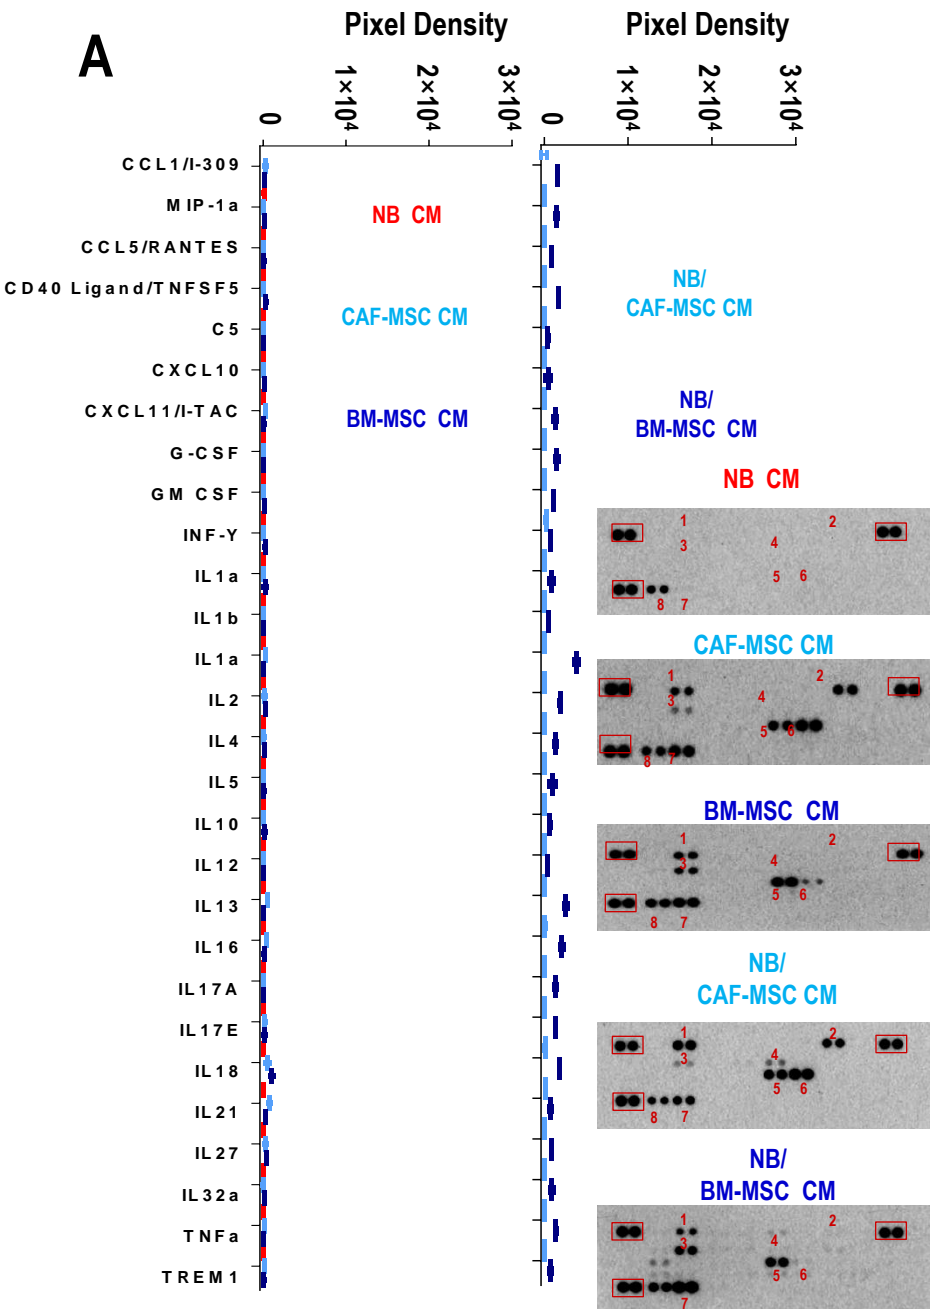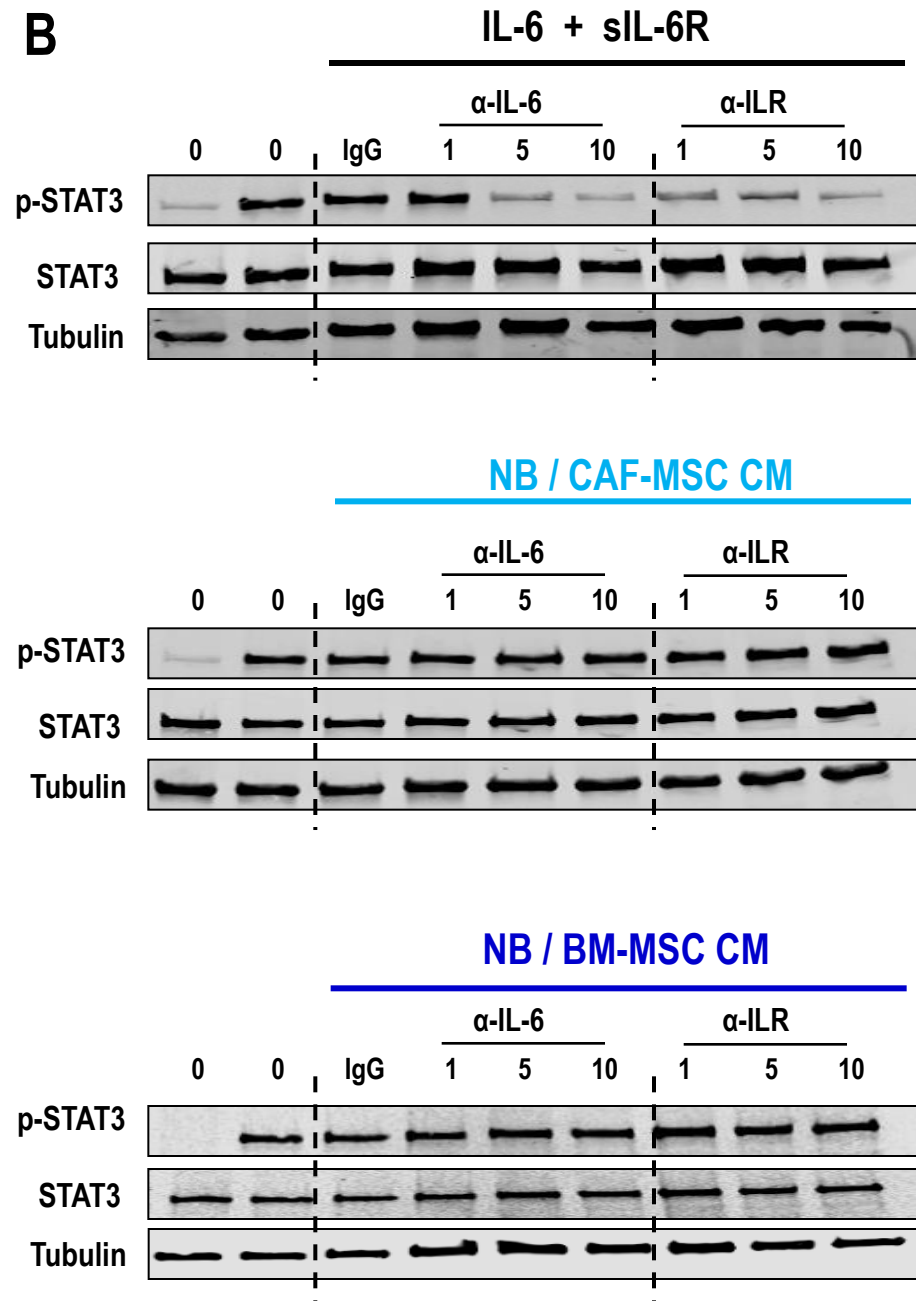

Supplementary Figure S6
